# Supplementary material for: Enhancing press freedom through greater privacy law: A UK perspective on an Australian privacy tort
Source: Springer Nature journal article supplement (doi:10.1186/s13058-019-1231-z), 2014-12-10

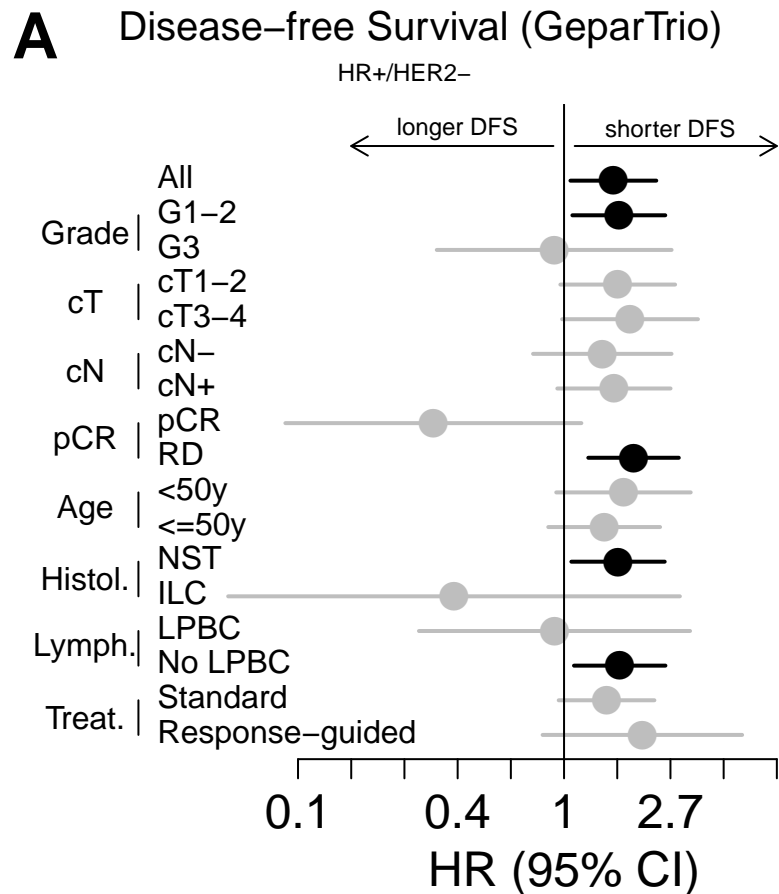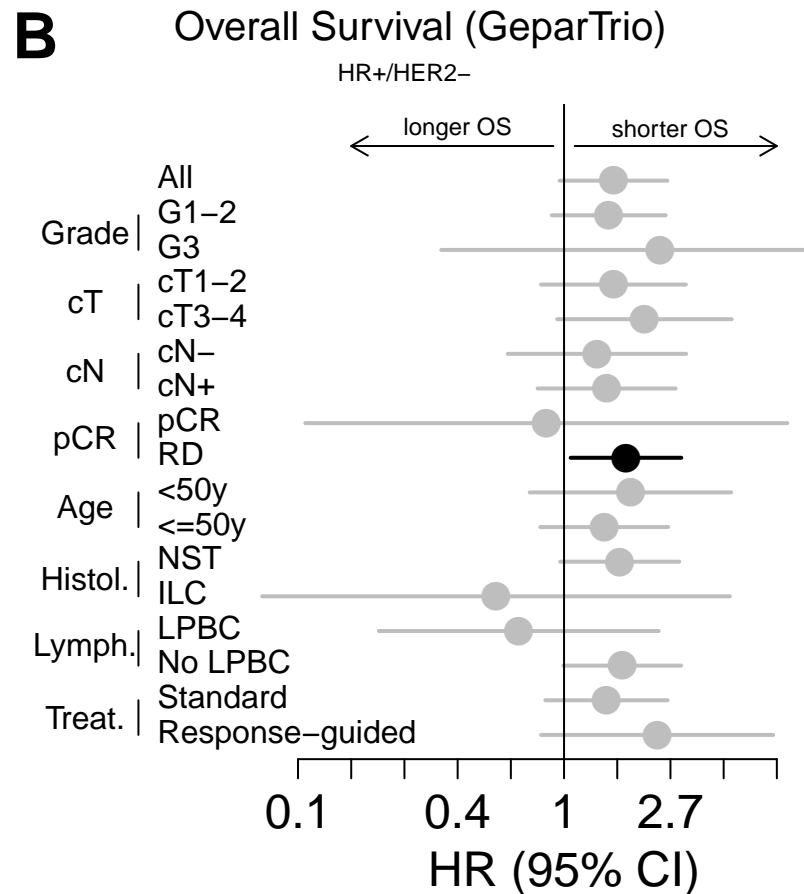

Supplement: MOESM1 [file 23393668]
