# Supplementary material for: Enhancing press freedom through greater privacy law: A UK perspective on an Australian privacy tort
Source: Springer Nature journal article supplement (doi:10.1186/s13058-019-1231-z), 2014-12-10
Supplement: MOESM2 [file 23393668]

10 11 12 13 14 15 16

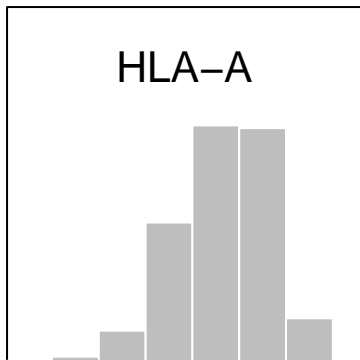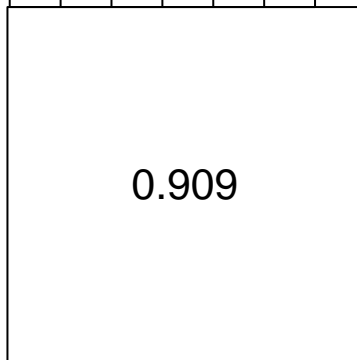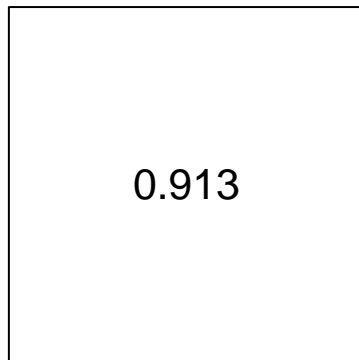

11 12 13 14 15 16 17

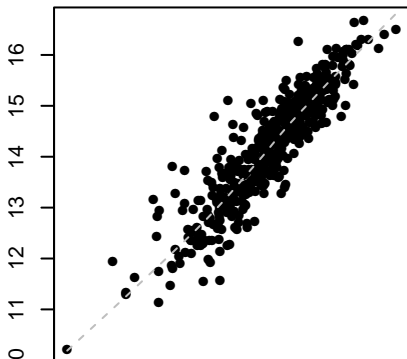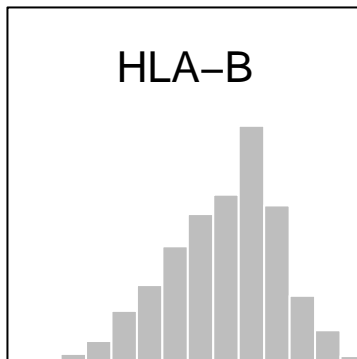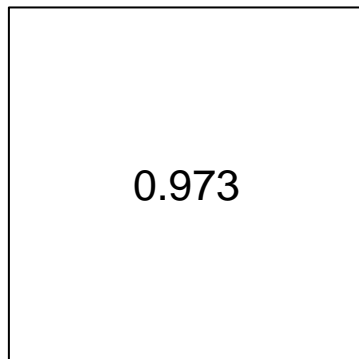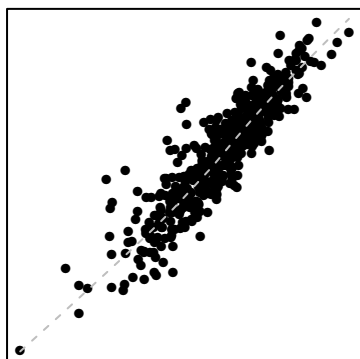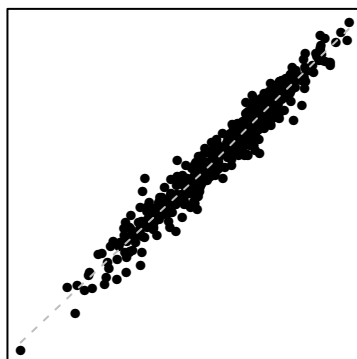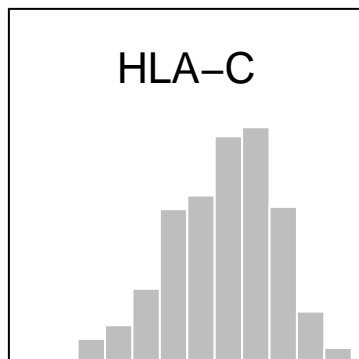

11 12 13 14 15 16
